# Supplementary material for: Identifying the Genes Regulated by AtWRKY6 Using Comparative Transcript and Proteomic Analysis under Phosphorus Deficiency
Source: MDPI journal article supplement (doi:10.3390/ijms18051046), 2017-05-12
Supplement: s1 [file s1]

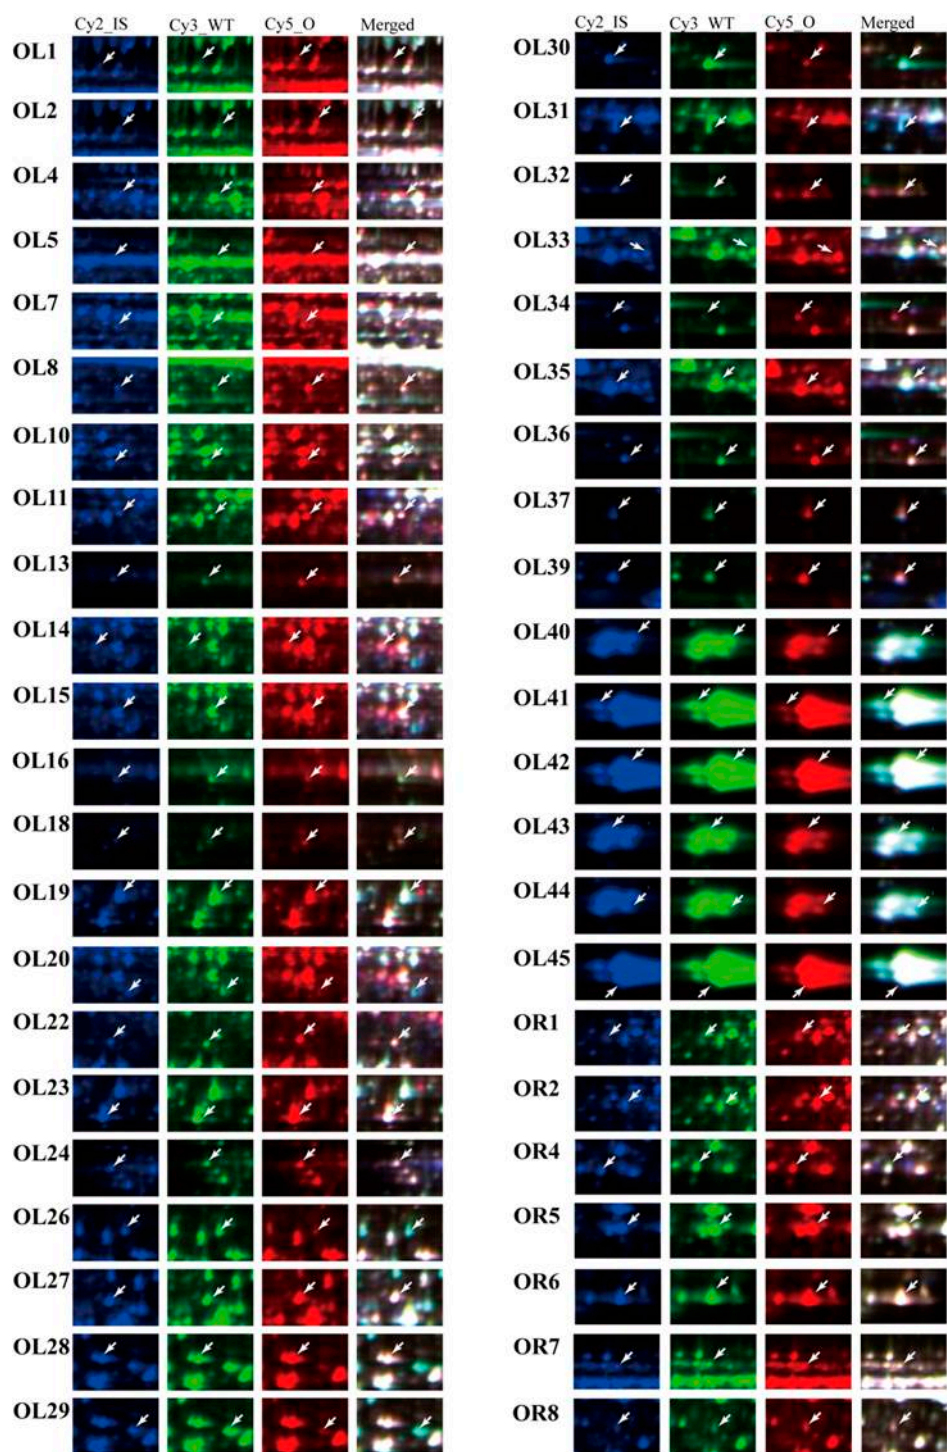

**Figure S1.** Some protein spots from leaves and roots of 35S:WRKY6-9 were listed.

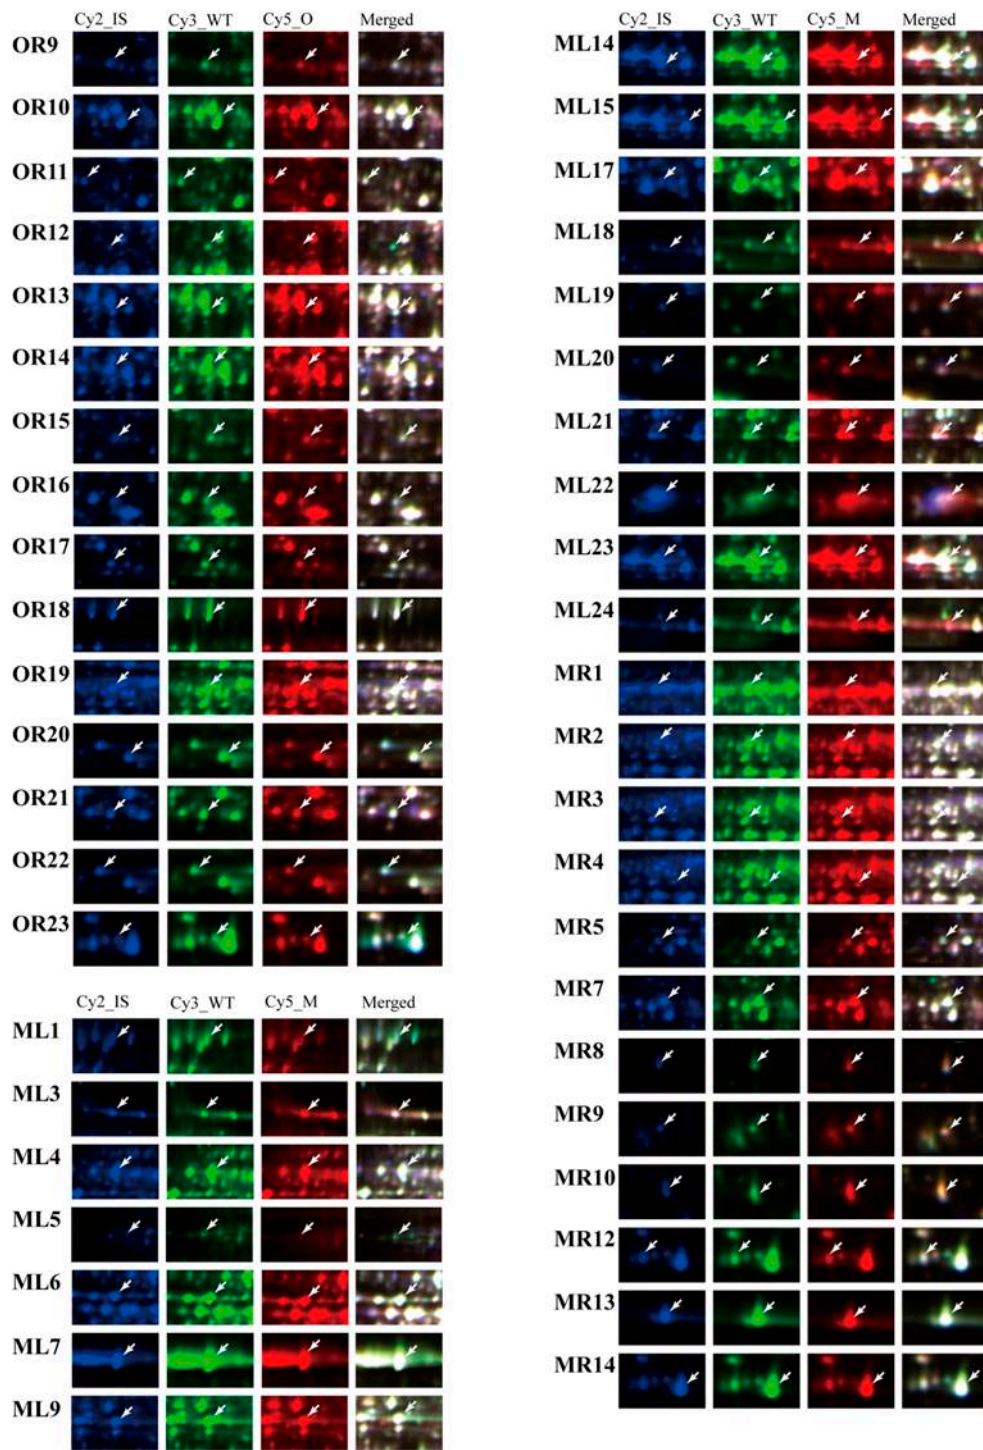

**Figure S2.** Some protein spots from leaves and roots of 35S:WRKY6-9 and *wrky6-1* were listed.
