# Supplementary material for: Identifying the Genes Regulated by AtWRKY6 Using Comparative Transcript and Proteomic Analysis under Phosphorus Deficiency
Source: Int J Mol Sci. 2017 May 12;18(5):1046. doi: 10.3390/ijms18051046 (PMC5454958; doi:10.3390/ijms18051046)
Supplement: Supplementary file 1 [file ijms-18-01046-s001.zip]

Archive with 7 entries (7 files):
- Supplementary Figures.pdf
- Supplementary File S1 Mass spectrometry data.pdf
- Table S1 Different expressed proteins were listed in wrky6-1 -.xls
- Table S2  Gene expression level in three materials.xlsx
- Table S3  Number of W-box elements on52 gene promoter regions.xlsx
- Table S4  Experimental design of the 2D-DIGE experiment.xls
- Table S5 QRT-PCR primer sequnece.xlsx
