# Supplementary material for: Identifying the Genes Regulated by AtWRKY6 Using Comparative Transcript and Proteomic Analysis under Phosphorus Deficiency
Source: Int J Mol Sci. 2017 May 12;18(5):1046. doi: 10.3390/ijms18051046 (PMC5454958; doi:10.3390/ijms18051046)
Supplement: Supplementary file 1 [file ijms-18-01046-s001.zip › Table S1 Different expressed proteins were listed in wrky6-1 -.xls]

## Sheet: ML
Table S1. Different expressed proteins were listed in wrky6-1
Spot	Protein name	Score	Genbank accession	Relative fold change VS control	Matches	Coverage
ML1	AT5g26000/T1N24_7	238	AAL06896.1	-1.67	3	7
ML3	Thioglucoside glucohydrolase	183	CAA61592.1	1.65	3	7
ML4	ATP synthase CF1 alpha subunit	506	NP_051044.1	-1.57	6	13
ML5	HCEF1	214	OAP04789.1	-1.93	3	8
ML6	At2g39730/T5I7.3	517	AAN18180.1	-1.67	6	22
ML7	Ribulose-1,5-bisphosphate carboxylase/oxygenase large subunit	488	AAO19414.1	-1.8	6	14
ML9	At2g39730/T5I7.3	214	AAN18180.1	-1.61	3	10
ML14	Plastid-lipid associated protein PAP / fibrillin family protein	216	NP_566728.1	1.63	3	12
ML15	putative lactoylglutathione lyase	217	AAL07227.1	-1.66	3	12
ML17	2-Cys peroxiredoxin	97	CAA63909.1	1.89	1	5
ML18	Glutathione S-Transferase	218	AAM63854.1	1.8	3	18
ML19	2-Cys peroxiredoxin BAS1	164	AAM64537.1	1.5	3	11
ML20	2-Cys peroxiredoxin BAS1	164	AAM64537.1	1.59	3	11
ML21	PBPI	208	OAP02726.1	1.76	4	19
ML22	Ribulose bisphosphate carboxylase	80	CAA31948.1	2.03	2	10
ML23	33 kDa oxygen-evolving protein	140	CAA36675.1	-1.73	3	10
ML24	Glutathione S-transferase	206	AAG30126.1	2.99	3	13
MR1	AT3G17230	180	OAP03586.1	-1.2	3	7
MR2	JAL22	624	OAP09497.1	-1.3	9	26
MR3	JR1	426	OAP06341.1	-1.25	4	13
MR4	JR1	561	OAP06341.1	-1.22	7	22
MR5	Glutamine synthetase like protein	229	BAE98486.1	-1.31	3	7
MR7	Mannose-binding lectin superfamily protein	425	NP_188266.1	-1.21	5	28
MR8	Translationally-controlled tumor protein-like protein	74	AAM66134.1	1.23	1	5
MR9	Ribosomal protein L7Ae/L30e/S12e/Gadd45 family protein	227	NP_180766.1	1.32	3	25
MR10	Translationally-controlled tumor protein-like protein	74	AAM66134.1	1.25	1	5
MR12	MLP-like protein 329	66	NP_565265.1	-1.22	1	7
MR13	Polyketide cyclase/dehydrase and lipid transport superfamily protein	414	NP_194098.1	-1.48	7	35
MR14	MLP-like protein 328	369	NP_565264.1	-1.61	6	25
	AT5g26000: Myrosinase 1
	HCEF1:fructose 1,6-bisphosphatase
	At2g39730: Ribulose bisphosphate carboxylase
	PBPI:PYK10-binding protein 1
	AT3G17230:plant invertase/pectin methylesterase inhibitor
	JAL22:Jacalin-related lectin 22
	JR1:JA-responsive protein 1
