# Supplementary material for: Identifying the Genes Regulated by AtWRKY6 Using Comparative Transcript and Proteomic Analysis under Phosphorus Deficiency
Source: Int J Mol Sci. 2017 May 12;18(5):1046. doi: 10.3390/ijms18051046 (PMC5454958; doi:10.3390/ijms18051046)
Supplement: Supplementary file 1 [file ijms-18-01046-s001.zip › Table S2 Gene expression level in three materials.xlsx]

## Sheet: Sheet1
Table S2. Gene expression level in three materials
Spot	Protein name	Gene name	CW	35S:WRKY6-9	wrky6-1
OL1	Putative 2,3-bisphosphoglycerate-independent phosphoglycerate mutase	AT1G09780	0.74±0.06	1.57±0.12	0.76±0.07
OL2	Putative 2,3-bisphosphoglycerate-independent phosphoglycerate mutase	AT1G09780	0.74±0.06	1.57±0.12	0.76±0.07
OL4	ATP synthase CF1 alpha subunit
OL5	Mitochondrial F1 ATP synthase beta subunit	AT5G08690	0.2±0.002	0.7±0.057	0.1±0.01
OL7	Gamma-glutamylcysteine synthetase	AT4G23100	0.47±0.03	0.57±0.06	0.43±0.03
OL8	S-adenosylmethionine synthase	AT3G17390	0.86±0.09	2.09±0.32	0.82±0.07
OL10	Phosphoglycerate kinase	AT1G79550	0.1±0.01	0.086±0.07	0.23±0.03
OL11	Gln synthetase	AT1G66200	0.15±0.01	0.2±0.01	0.09±0.007
OL13	Malate dehydrogenase	AT1G04410	1.57±0.02	0.95±0.08	0.92±0.09
OL14	Annexin	AT1G35720	5.52±0.06	11.59±1.32	6.07±0.07
OL15	Annexin	AT1G35720	5.52±0.06	11.59±1.32	6.07±0.07
OL16	ATP synthase gamma	AT4G04640	0.9±0.05	3.39±0.5	0.5±0.06
OL18	Nitrilase I	AT3G44310	0.4±0.05	2.03±0.16	0.15±0.04
OL19	Fructose-bisphosphate aldolase 2	AT4G38970	0.7±0.06	0.11±0.01	0.3±0.02
OL20	Putative fructose bisphosphate aldolase	At2G21330	5.46±0.06	8.63±0.08	8.82±0.09
OL22	Mercaptopyruvate sulfurtransferase 1	AT1G79230	0.13±0.01	0.05±0.004	0.2±0.02
OL23	PYK10-binding protein 1	AT3G16420	6.2±0.65	9.6±0.87	6.5±0.74
OL24	14-3-3 protein	AT4G09000	0.6±0.05	0.978±0.08	0.44±0.05
OL26	Carbonic anhydrase 2	AT5G14740	2.2±0.23	0.8±0.08	3.5±0.41
OL27	Cytosolic triose phosphate isomerase	AT3G55440	2.50±0.33	2.76±0.28	2.15±0.21
OL28	Cytosolic triose phosphate isomerase	AT3G55440	2.50±0.33	2.76±0.28	2.15±0.21
OL29	Carbonic anhydrase 1	AT3G01500	4.5±0.43	0.9±0.47	11.4±0.94
OL30	Carbonic anhydrase 1	AT3G01500	4.5±0.43	0.9±0.47	11.4±0.94
OL31	Light-harvesting chlorophyll B-binding protein	AT5G54270	0.61±0.05	7.6±0.86	2.2±0.18
OL32	Glutathione transferase	AT2G30860	2.61±0.03	5.6±0.45	2.21±0.32
OL33	Ferritin 1	At5G01600	2.32±0.21	1.58±0.12	3.5±0.42
OL34	Glutathione S-transferase 6	AT1G02930	0.42±0.05	5.0±0.52	0.64±0.07
OL35	Ferritin 1	At5G01600	2.32±0.21	1.58±0.12	3.5±0.42
OL36	Fe-superoxide dismutase	At4G25100	2.15±0.3	3.64±0.45	2.81±0.31
OL37	Translationally-controlled tumor protein-like protein	AT3G16640	1.1±0.09	4.18±0.37	0.83±0.09
OL39	MLP-like protein 423	AT1G24020	0.02±0.002	0.016±0.001	0.01±0.001
OL40	Ribulose bisphosphate carboxylase	AT5G38410	11.6±1.54	18.1±1.98	23.43±3.21
OL41	Ribulose bisphosphate carboxylase	AT5G38410	11.6±1.54	18.1±1.98	23.43±3.21
OL42	Ribulose bisphosphate carboxylase	AT5G38410	11.6±1.54	18.1±1.98	23.43±3.21
OL43	Ribulose bisphosphate carboxylase	AT5G38410	11.6±1.54	18.1±1.98	23.43±3.21
OL44	Ribulose bisphosphate carboxylase	AT1G67090	0.03±0.002	0.16±0.001	0.06±0.005
OL45	Ribulose bisphosphate carboxylase	AT1G67090	0.03±0.002	0.16±0.001	0.06±0.005
OR1	PfkB-like carbohydrate kinase family protein	AT5G51830	0.14±0.02	0.18±0.02	0.17±0.02
OR2	ACC oxidase	AT1G62380	1.35±0.1	3.43±0.41	1.78±0.15
OR4	Chaperonin 10	AT5G20720	0.55±0.04	0.11±0.02	1.4±0.9
OR5	Dehydroascorbate reductase	AT1G19570	2.11±0.27	12±1.5	0.6±0.08
OR6	Glutathione S-transferase	AT2G30860	1.43±0.1	3.21±0.3	1.54±0.1
OR7	Mitochondrial chaperonin (HSP60)	At2G33210	0.38±0.04	0.98±0.1	1±0.1
OR8	Tryptophan synthase beta subunit	AT3G54640	0.32±0.02	0.81±0.07	0.16±0.02
OR9	Putative cysteine proteinase AALP	AT5G60360	1.13±0	0.54±0.05	1.01±0.1
OR10	Putative lactoylglutathione lyase	AT1G11840	1.01±0.1	0.62±0.02	1.22±0.1
OR11	Glyoxalase II	At1G53580	0.28±0.03	0.14±0.01	0.34±0.03
OR12	Mercaptopyruvate sulfurtransferase 1	AT1G79230	0.28±0.02	0.08±0.009	0.59±0.04
OR13	Transketolase family protein	AT5G50850	0.35±0.03	0.13±0.01	0.36±0.04
OR14	MLP-like protein 34	AT1G70850	2.55±0.3	1.7±0.4	1.86±0.2
OR15	NmrA-like negative transcriptional regulator family protein	AT1G75280	0.18±0.02	0.08±0.01	0.19±0.02
OR16	Glutathione S-transferase 26	AT1G17190	3.3±0.03	13.4±1.52	22.2±3.65
OR17	14-3-3 protein	AT5G10450	4.8±0.5	3±0.4	2.2±0.2
OR18	Jacalin-like lectin domain-containing protein	AT3G16460	2.2±0.3	0.97±0.09	0.22±0.03
OR19	Beta-fructofuranosidase	AT3G16390	0.45±0.03	0.32±0.03	0.06±0.008
OR20	Glutathione S-transferase	At2G47730	0.61±0.05	0.26±0.02	0.67±0.07
OR21	Ferritin 1	AT5G01600	3.11±0.3	3.67±0.4	3.24±0.3
OR22	Glutathione S-transferase	AT4G02520	1.11±0.1	0.65±0.06	1.9±0.2
OR23	Glycine-rich RNA-binding protein 8	AT4G39260	0.5±0.04	0.15±0.01	0.7±0.08
