# Supplementary material for: Identifying the Genes Regulated by AtWRKY6 Using Comparative Transcript and Proteomic Analysis under Phosphorus Deficiency
Source: Int J Mol Sci. 2017 May 12;18(5):1046. doi: 10.3390/ijms18051046 (PMC5454958; doi:10.3390/ijms18051046)
Supplement: Supplementary file 1 [file ijms-18-01046-s001.zip › Table S3 Number of W-box elements on52 gene promoter regions.xlsx]

## Sheet: Sheet1
Table S3. Number of W-box elements on 52 gene promoter regions
Spot	Protein name	Gene name	W-box(TTGACC) number on promter(2Kb)
OL1	Communis phosphoglycerate mutase	AT1G09780	1
OL2	Communis phosphoglycerate mutase	AT1G09780	1
OL4	ATP synthase CF1 alpha subunit
OL5	Mitochondrial F1 ATP synthase beta subunit	AT5G08690	1
OL7	Gamma-glutamylcysteine synthetase	AT4G23100	0
OL8	S-adenosylmethionine synthase	AT3G17390	1
OL10	Phosphoglycerate kinase	AT1G79550	0
OL11	Gln synthetase	AT1G66200	1
OL13	Malate dehydrogenase	AT1G04410	0
OL14	Annexin	AT1G35720	0
OL15	Annexin	AT1G35720	0
OL16	ATP synthase gamma	AT4G04640	0
OL18	Nitrilase I	AT3G44310	1
OL19	Fructose-bisphosphate aldolase 2	AT4G38970	0
OL20	Putative fructose bisphosphate aldolase	At2G21330	0
OL22	Mercaptopyruvate sulfurtransferase 1	AT1G79230	0
OL23	PYK10-binding protein 1	AT3G16420	0
OL24	14-3-3 protein	AT4G09000	1
OL26	Carbonic anhydrase 2	AT5G14740	1
OL27	Cytosolic triose phosphate isomerase	AT3G55440	0
OL28	Cytosolic triose phosphate isomerase	AT3G55440	0
OL29	Carbonic anhydrase 1	AT3G01500	0
OL30	Carbonic anhydrase 1	AT3G01500	0
OL31	Light-harvesting chlorophyll B-binding protein	AT5G54270	0
OL32	Glutathione transferase	AT2G30860	2
OL33	Ferritin 1	At5G01600	0
OL34	Glutathione S-transferase 6	AT1G02930	1
OL35	Ferretin 1	At5G01600	0
OL36	Fe-superoxide dismutase	At4G25100	0
OL37	Translationally-controlled tumor protein-like protein	AT3G16640	0
OL39	MLP-like protein 423	AT1G24020	0
OL40	Ribulose bisphosphate carboxylase	AT5G38410	0
OL41	Ribulose bisphosphate carboxylase	AT5G38410	0
OL42	Ribulose bisphosphate carboxylase	AT5G38410	0
OL43	Ribulose bisphosphate carboxylase	AT5G38410	0
OL44	Ribulose bisphosphate carboxylase	AT1G67090	1
OL45	Ribulose bisphosphate carboxylase	AT1G67090	1
OR1	PfkB-like carbohydrate kinase family protein	AT5G51830	1
OR2	ACC oxidase	AT1G62380	0
OR4	Chaperonin 10	AT5G20720	1
OR5	Dehydroascorbate reductase	AT1G19570	0
OR6	Glutathione S-transferase	AT2G30860	2
OR7	Mitochondrial chaperonin (HSP60)	At2G33210	0
OR8	Tryptophan synthase	AT3G54640	1
OR9	Thiol protease aleurain	AT5G60360	0
OR10	Glyoxalase I	AT1G11840	0
OR11	Glyoxalase II	At1G53580	1
OR12	Mercaptopyruvate sulfurtransferase 1	AT1G79230	0
OR13	Pyruvate dehydrogenase	AT5G50850	0
OR14	MLP-like protein 34	AT1G70850	0
OR15	Isoflavone reductase	AT1G75280	0
OR16	Glutathione S-transferase 26	AT1G17190	0
OR17	14-3-3 protein	AT5G10450	2
OR18	Jacalin-like lectin domain-containing protein	AT3G16460	1
OR19	Beta-fructofuranosidase	AT3G16390	0
OR20	Glutathione S-transferase	At2G47730	0
OR21	Ferretin 1	AT5G01600	0
OR22	Glutathione S-transferase	AT4G02520	0
OR23	Glycine-rich RNA-binding protein 8	AT2G21660	0
