# Supplementary material for: Identifying the Genes Regulated by AtWRKY6 Using Comparative Transcript and Proteomic Analysis under Phosphorus Deficiency
Source: Int J Mol Sci. 2017 May 12;18(5):1046. doi: 10.3390/ijms18051046 (PMC5454958; doi:10.3390/ijms18051046)
Supplement: Supplementary file 1 [file ijms-18-01046-s001.zip › Table S4 Experimental design of the 2D-DIGE experiment.xls]

## Sheet: Sheet1
Table S4. Experimental design of the 2D-DIGE experiment
Gel NO.	Cy2	Cy3	Cy5
47779	Internal standard	Wild-type leaves-1	35S:WRKY6-9 leaves-1
47778	Internal standard	Wild-type leaves-2	wrky6-1 leaves-1
47777	Internal standard	Wild-type roots-1	35S:WRKY6-9 roots-1
47776	Internal standard	Wild-type roots-2	wrky6-1 roots-1
47150	Internal standard	Wild-type roots-3	35S:WRKY6-9 roots-2
47149	Internal standard	Wild-type roots-4	wrky6-1 roots-2
47148	Internal standard	Wild-type leaves-3	35S:WRKY6-9 leaves-2
47147	Internal standard	Wild-type leaves-4	wrky6-1 leaves-2
47146	Internal standard	Wild-type roots-5	35S:WRKY6-9 roots-3
47136	Internal standard	Wild-type roots-6	wrky6-1 roots-3
