# Supplementary material for: Identifying the Genes Regulated by AtWRKY6 Using Comparative Transcript and Proteomic Analysis under Phosphorus Deficiency
Source: Int J Mol Sci. 2017 May 12;18(5):1046. doi: 10.3390/ijms18051046 (PMC5454958; doi:10.3390/ijms18051046)
Supplement: Supplementary file 1 [file ijms-18-01046-s001.zip › Table S5 QRT-PCR primer sequnece.xlsx]

## Sheet: 引物序列
Table S5. QRT-PCR primer sequnece
Gene	Sequence
AT1G09780F	AAATTGGTGAGAAGGCAAGG
AT1G09780R	AACCAGGACCTCCAATAGCA
AT5G08690F	TGAGCTCGGTATCTATCCTG
AT5G08690R	ACGATTGTTCGGAAAGATCA
AT4G23100F	TTTCTGGGTGGGTTTATT
AT4G23100R	CTTCCTTGTAGCCTCTGC
AT3G17390F	GTGTTCGTGGACAGTTATG
AT3G17390R	GCTTGGACCTTGTTAGAC
AT1G79550F	GTGGTTATTGCTGACAAGTT
AT1G79550R	CTTACCCTCAAGAAGCTCCA
AT1G66200F	ACCCAAAACCTATTCCTGGT
AT1G66200R	ATGTTTGAAGCTGGCCTCCT
AT1G04410F	TGCATGGTTGGACGGAGAAT
AT1G04410R	TCATCAATCGGAAGGCCTTG
AT1G35720F	ACTTTGTCGATGTTCTTC
AT1G35720R	ACGAGTGTCTTTGGTAAT
AT4G04640F	CTAAAGGAGAGATCTGTGAC
AT4G04640R	TCTTGAGATC CGATGCATTA
AT3G44310F	ATGCTTCACATTGCGATCGA
AT3G44310R	GGGTGCTCAT TTACGGTCAA
AT4G38970F	TAAAGACAGAGCTACTCCTG
AT4G38970R	TTTCCGAGCT GAGCCAACGA
AT2G21330F	ACTCTCAAGCTCCTTCGCAA
AT2G21330R	AGTGTATTTC CCGAGCTGAG
AT1G79230F	AACCTTTCAGACTAAGTTCC
AT1G79230R	TTGTCCAGTGAGATATCTTC
AT3G16420F	AGGAGGTCACAGGAGAAG
AT3G16420R	TCAAGTCCAAAGGGAGGA
AT4G09000F	ATTCTCCAGATCGTGCTTGT
AT4G09000R	GGTGCTGCTT CTTTGATGTC
AT5G14740F	CCATTGAATACGCTGTCTTG
AT5G14740R	GTCATAGTAG CCTCCCTTCA
AT3G55440F	AGCCCAAGCTCAAGAAGT
AT3G55440R	CACCACCGACCAAGAAAC
AT3G01500F	TGATAGGACACAGTGCATGT
AT3G01500R	ACGAAGTCATAGTAGCCTCC
AT5G54270F	GGTTTGGACTACTTAGGCAA
AT5G54270R	TCAAGATGGT CAAGGAGATT
AT2G30860F	CACTTACCACCCACCGCTAT
AT2G30860R	TTTCCCAATCGGACCAAC
AT5G01600F	CTGAGAAGTTTATGGAGTAC
AT5G01600R	GATCATCCTT AGCTGGGTG
AT1G02930F	AGTCCTCGATGTTTACGA
AT1G02930R	TGATGTCAGCAACCCAAG
AT3G16640F	GTGGTGAGGATGAAGGTGTT
AT3G16640R	TCAAACCATG AGCGAAGTAC
AT1G24020F	GGCGACGGCATCAATCTC
AT1G24020R	TGGGCGGTCTTCTCAAAC
AT5G38410F	TGAGACTCTATCTTACCTCC
AT5G38410R	TGATGCATTG GACTTGACGG
AT1G67090F	GGAAGAGTTAACTGCATGCA
AT1G67090R	CACTGGACTTGACGGGTGTT
AT3G46950F	GACGCTGAGGAAGAAGTT
AT3G46950R	GACAGATGAAATCGGAGG
AT3G03580F	CAGAAGCCATCTACAAGTC
AT3G03580R	TATCTCACGTCCCACAAT
AT5G51830F	GGTAGAGTTGGTGGAGTAAA
AT5G51830R	GAGCGAGTAGAAGAAAGAAG
AT1G62380F	AACCAACGGGAAGTATAAGA
AT1G62380R	CTCGACAAGCGAAGTAGC
AT5G20720F	TGTGAAGCATCTTATCCTCA
AT5G20720R	CCTTGAAGTC GTTACCAGCA
AT1G19570F	ATCCTGATCCACCACTCAAG
AT1G19570R	CAAAAGAGTC GAGCGAGAAC
AT2G33210F	TCCACAGCTAACTTTGATCA
AT2G33210R	GAGATGCTAC CTCTTTCGTT
AT3G54640F	AACAACGACATTGAGCTGGT
AT3G54640R	AAGCTCCTTA AGTCCTTCAG
AT5G60360F	GCCAGTAAGCATAGCATT
AT5G60360R	CACCGTCTTCAACTCCATAA
AT1G11840F	CTATAACTACGACGTGACTG
AT1G11840R	CTTTCCTCCTAGCTCTTG
AT1G53580F	TCTATCCTGCTCACGACT
AT1G53580R	TGTAACCCACAGACCATAT
AT5G50850F	CGCAGAAGAGGGAATAAG
AT5G50850R	CTACAACCGACGCACAAA
AT1G70850F	GGGCACAGTCGGCTCTAT
AT1G70850R	CCACCTCCTCGTTTATTT
AT1G75280F	ATGGAAATGCCAAAGCTGTG
AT1G75280R	ACATCAGGGT AAAGCTCAGA
AT1G17190F	TACCAGAAGTCTCGAGCTAG
AT1G17190R	CAATGCCTTG ACCACACTCT
AT5G10450F	ATCATCGGTACATGGCTGAG
AT5G10450R	ATCGGAGGTC CAAAGGGTTA
AT3G16460F	CAAGATGGTATTGGAGCGGT
AT3G16460R	GAAGTAGATC ACCAGCTCTT
AT3G16390F	TAACGGATGTGAAGTAGATG
AT3G16390R	AGCTTTACCA CCATGCATCA
AT2G47730F	GAAAGTCAAGGCAACCAC
AT2G47730R	GAATCACCAGCCAAGAAC
AT4G02520F	CAGACGAAGCCGTTGTTG
AT4G02520R	GGGAGTTCCGAGCAGGTA
Actin2/8F	ACGGTAACATTGTGCTCAGTGGTG
Actin2/8R	CTTGGAGATCCACATCTGCTGGA
